# Supplementary material
Source: Springer Nature journal article supplement (https://www.springermedizin.de/resource/supplementary/12943_2012_1114_MOESM5_ESM.pdf/9552476)

**(a)**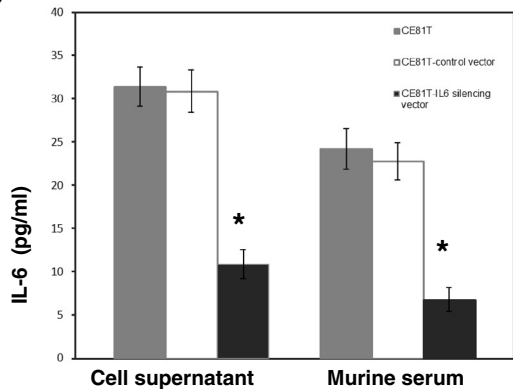**(b)**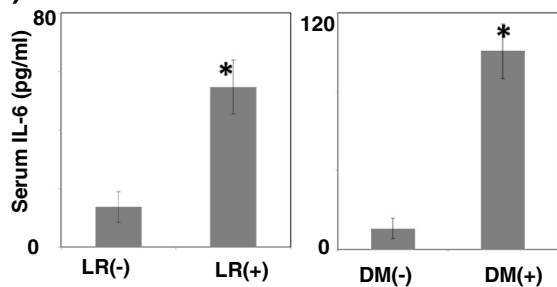**(c) 20 days after tumor implantation**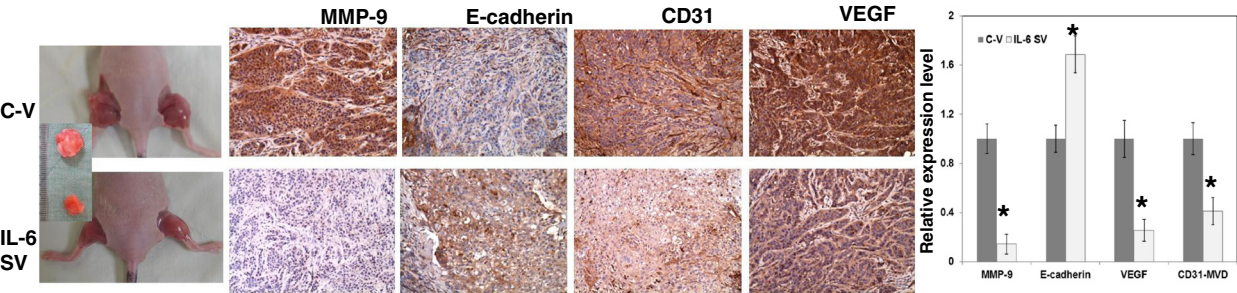

Supplement: MOESM5 [file 9552476]
